# Supplementary material for: GALNT2 targeted by miR-139-5p promotes proliferation of clear cell renal cell carcinoma via inhibition of LATS2 activation
Source: Springer Nature journal article supplement (doi:10.1007/s12672-024-00930-4), 2024-03-13
Supplement: MOESM3 [file 26853572]

## Supplementary Figure 1

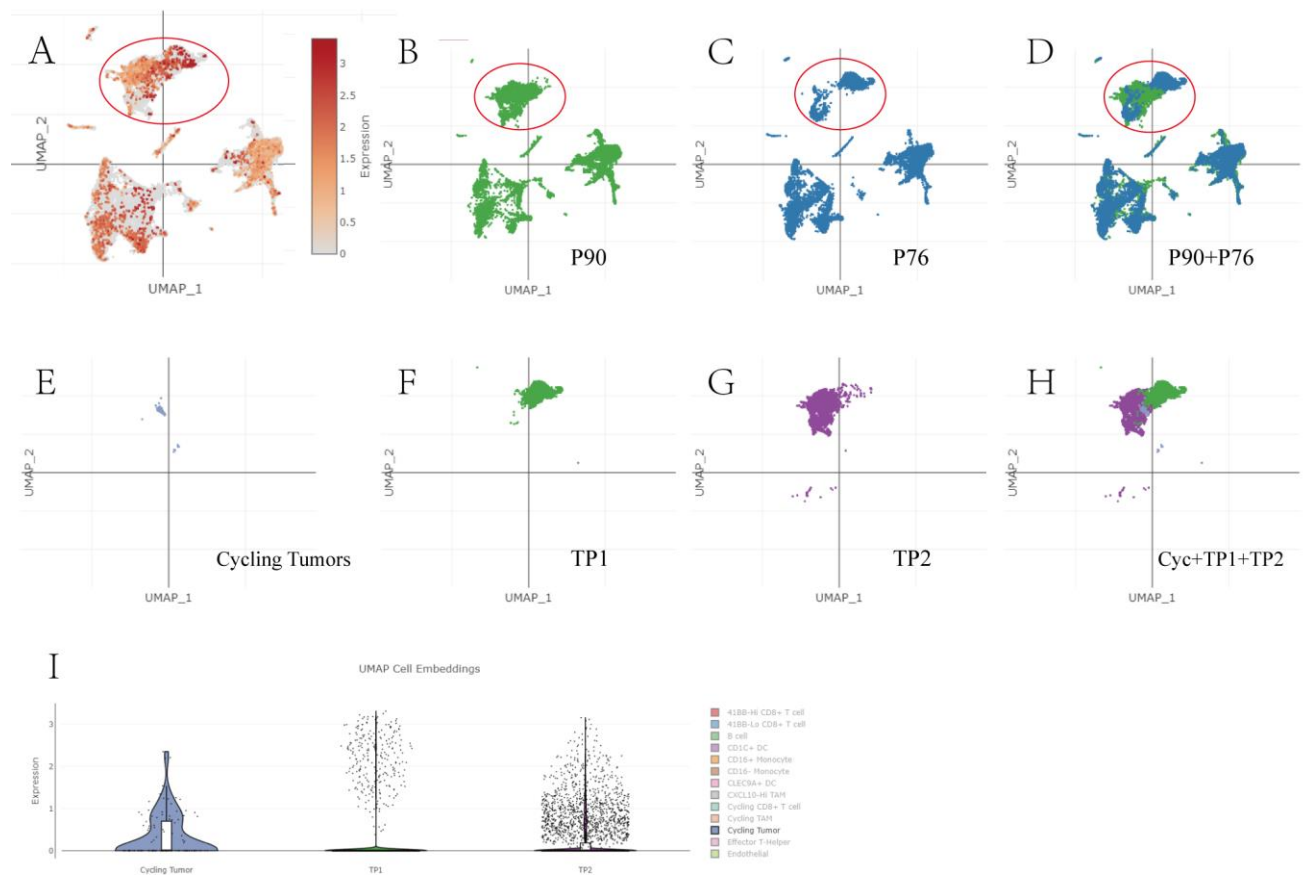

Supplementary Fig.1. The single cell expression levels of GALNT2 in different ccRCC stage in Single cell Portal. ([https://singlecell.broadinstitute.org/single\\_cell/study/SCP1288/tumor-and-immune-reprogramming-during-immunotherapy-in-advanced-renal-cell-carcinoma#study-visualize](https://singlecell.broadinstitute.org/single_cell/study/SCP1288/tumor-and-immune-reprogramming-during-immunotherapy-in-advanced-renal-cell-carcinoma#study-visualize))

Sample : P90, Study ID: 0600890\_T1 , Age: 71, Sex: Female, Biopsy site: Kidney, Histology: ccRCC, Grade: 4, Stage: I, Cells: 8426.

Sample : P76, Study ID:0600876\_T1 , Age: 68, Sex: Female, Biopsy site: Kidney, Histology: ccRCC, Grade: 4, Stage: IV, Cells: 7912.

(A) The UMAP of the expression of GALNT2, (B) The UMAP of P90, (C) The UMAP of P76, (D) The UMAP of P90+P96, (E) The UMAP of the cycling tumor cells, (F) The UMAP of TP1, (G) The UMAP of TP2, (H) The UMAP of cycling tumor cells, TP1 and TP2, (I) The GALNT2 expression of cycling tumor cells, TP1 and TP2.

GALNT2 targeted by miR-139-5p  
promotes proliferation of clear cell renal  
cell carcinoma via inhibition of LATS2  
activation

Gels and Blots

# WB Marker

## 产品图例

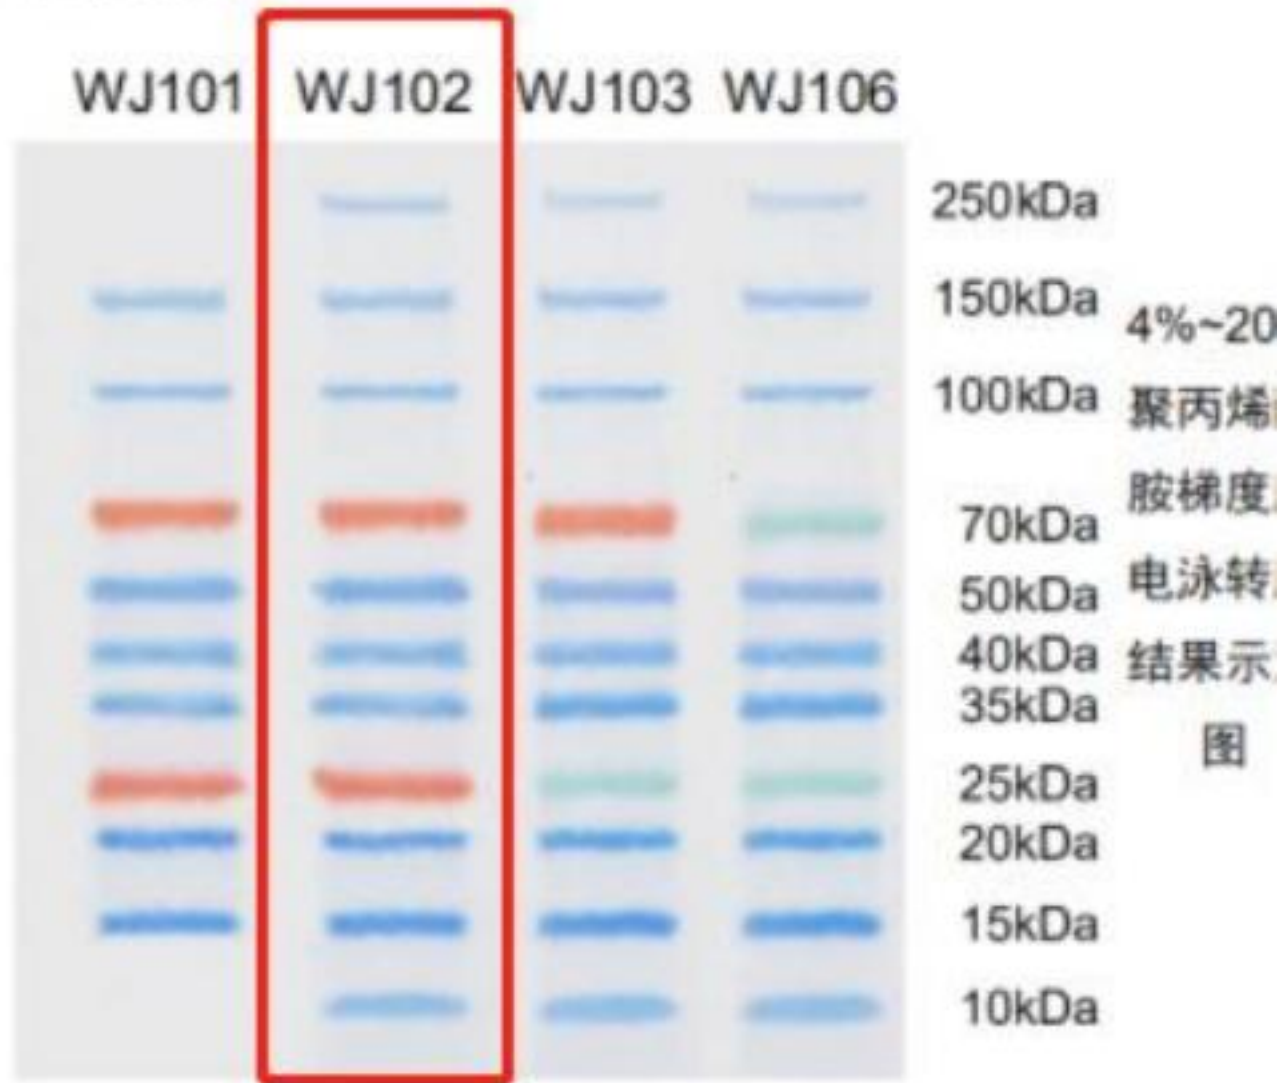

# Figure 2B

Caki-1

OS-RC-2

*oe-vector*  
*oe-GALNT2*  
*oe-vector*  
*oe-GALNT2*

*oe-vector*  
*oe-GALNT2*  
*oe-vector*  
*oe-GALNT2*

GALNT2

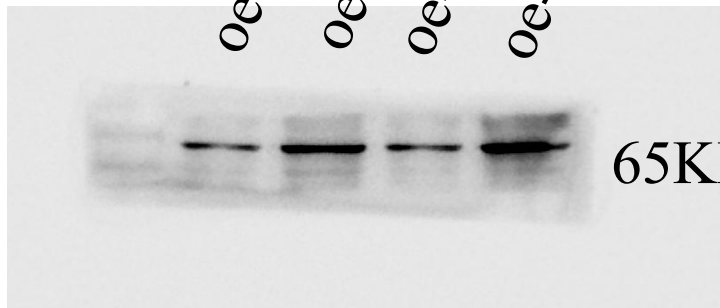

GALNT2

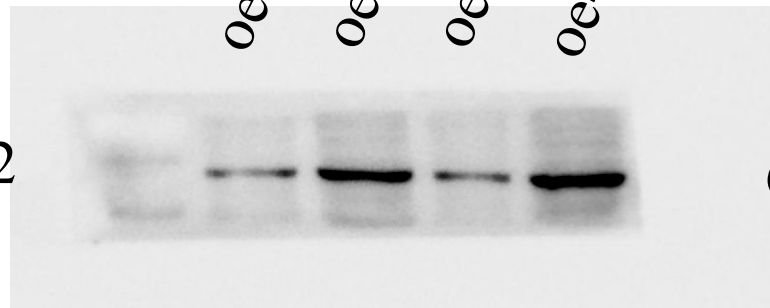

65KD

$\beta$ -actin

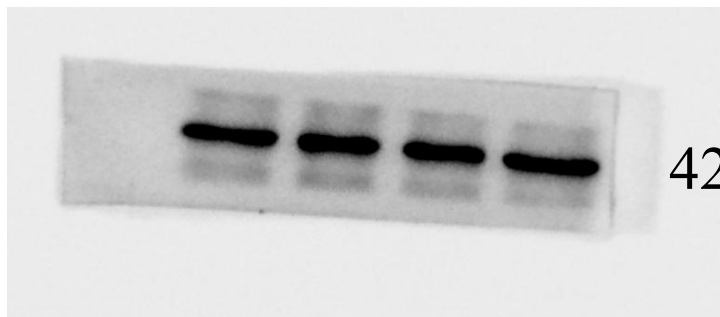

42KD

$\beta$ -actin

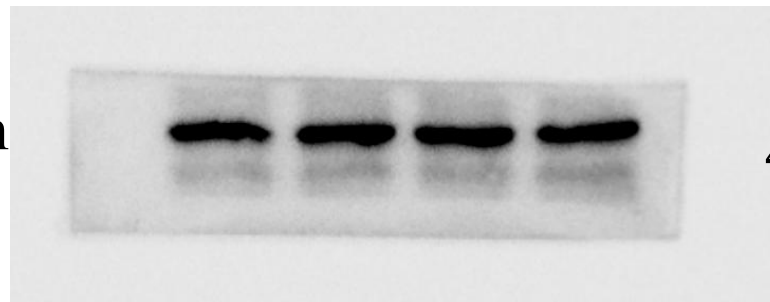

42KD

# Figure 3B

786-O

ACHN

shNC shRNA1 shRNA2 shRNA3

shNC shRNA1 shRNA2 shRNA3

GALNT2

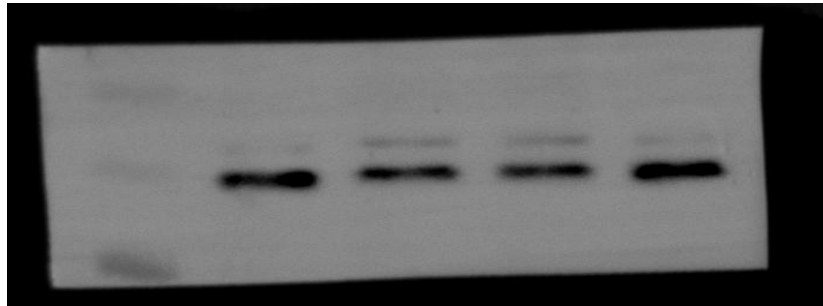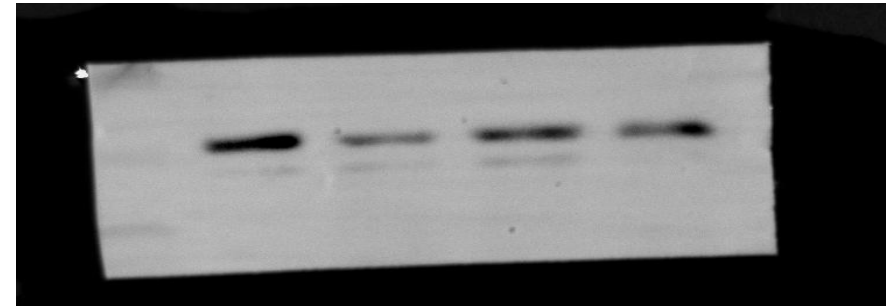

65KD

GAPDH

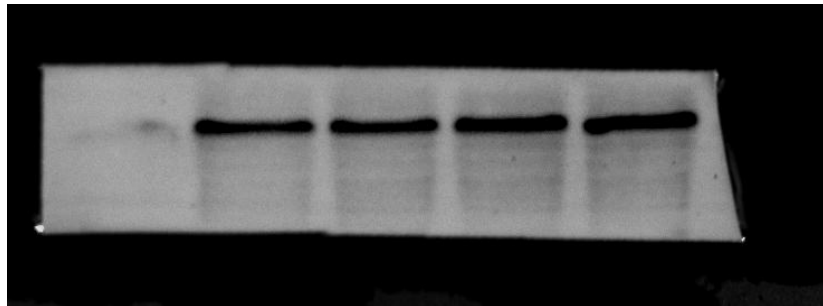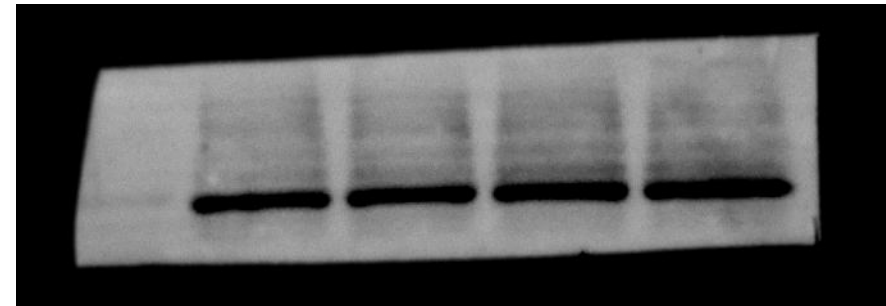

36KD

# Figure 3C

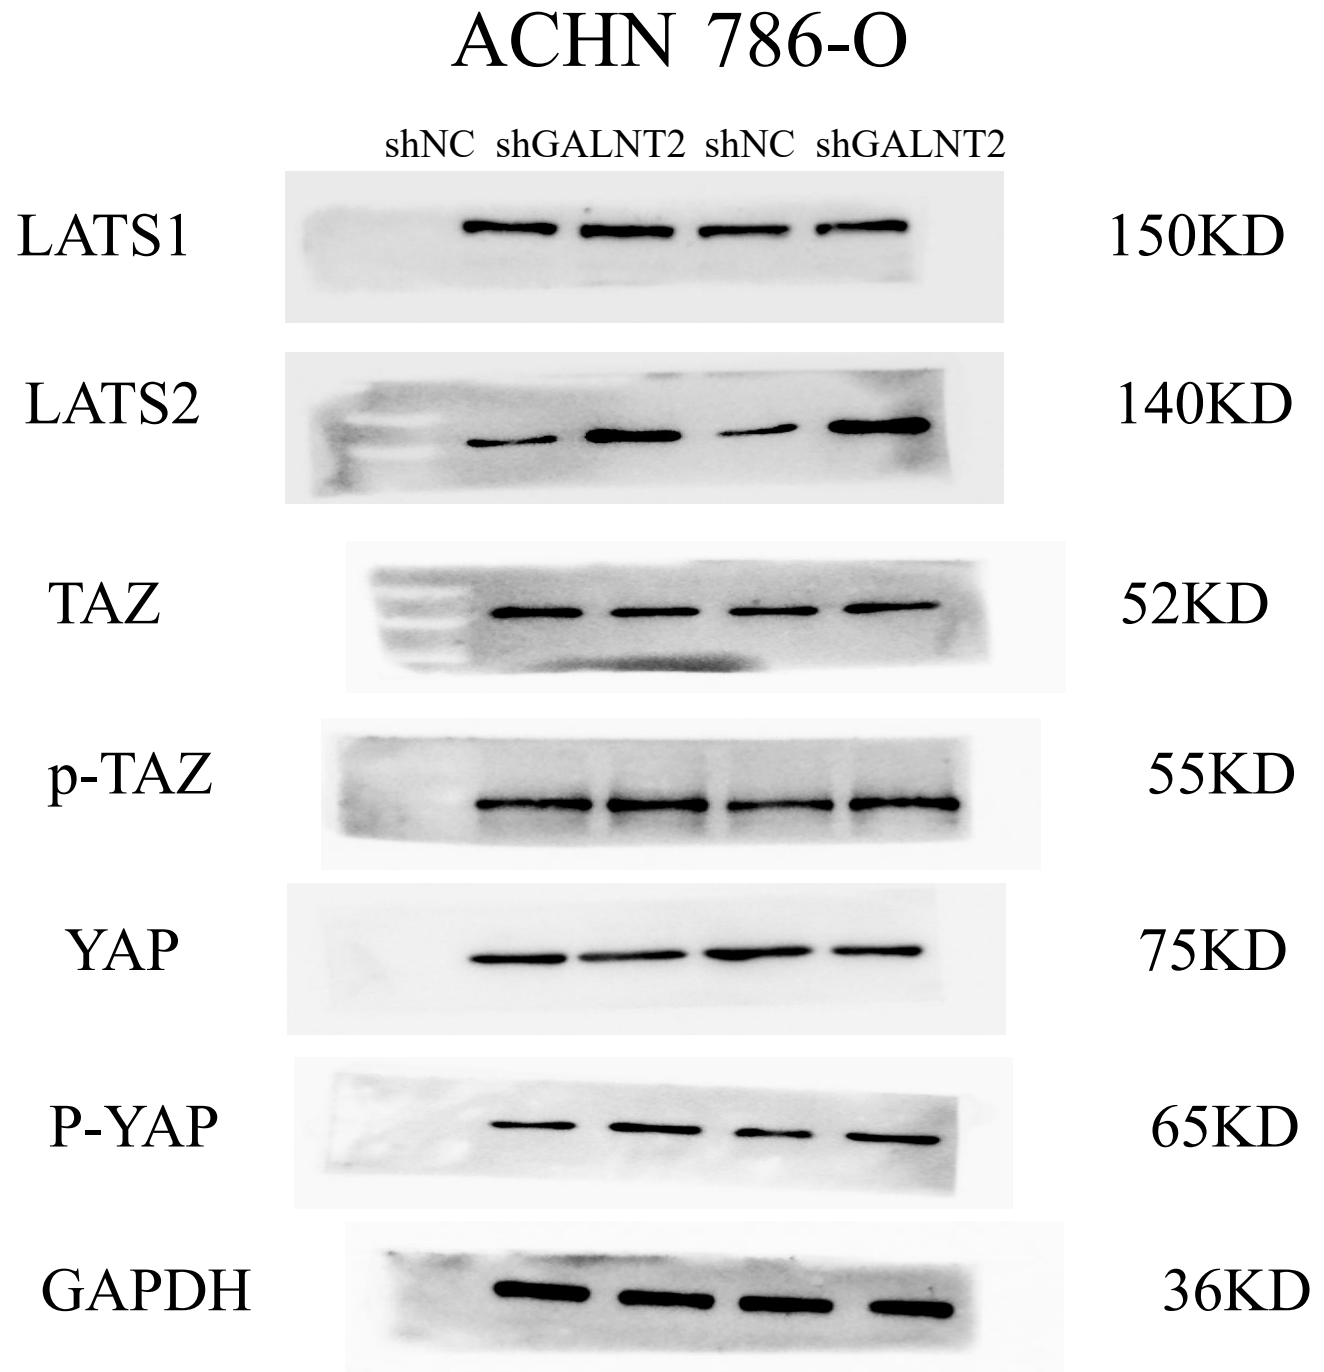

# Figure 3D

786-O

ACHN

shNC shGALNT2 shNC shGALNT2

shNC shGALNT2 shNC shGALNT2

LATS2

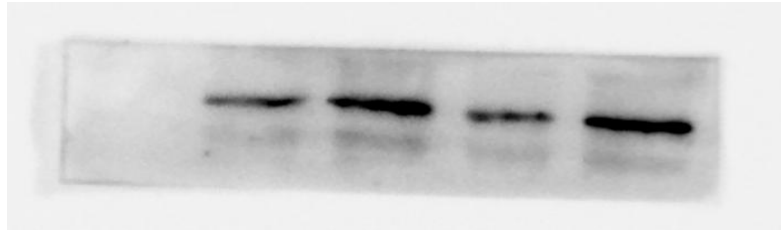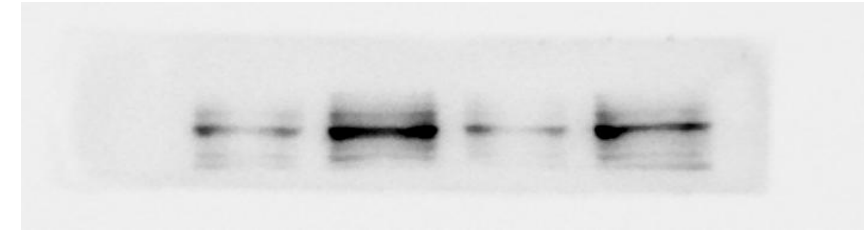

120KD

p-LATS2

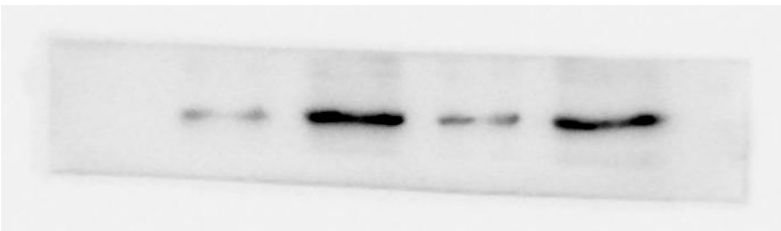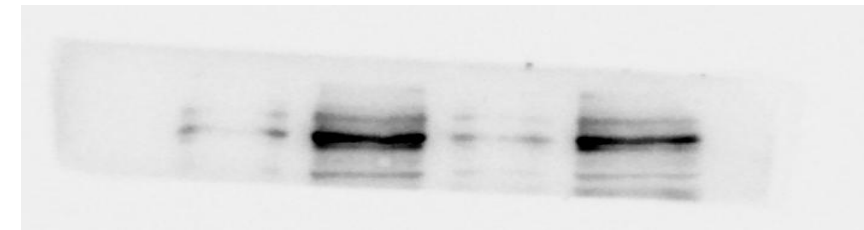

127KD

$\beta$ -actin

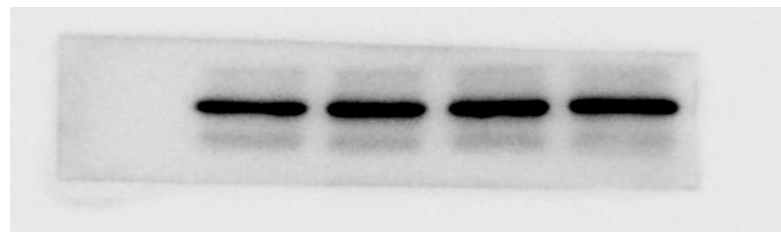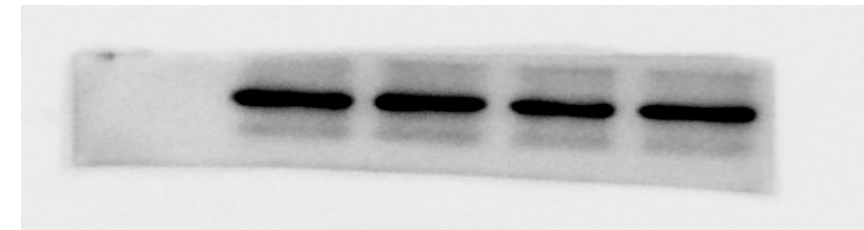

42KD

# Figure 4K

Caki-1

OS-RC-2

mimicNC miR139-5p mimic  
mimicNC miR139-5p mimic

mimicNC miR139-5p mimic  
mimicNC miR139-5p mimic

GALNT2

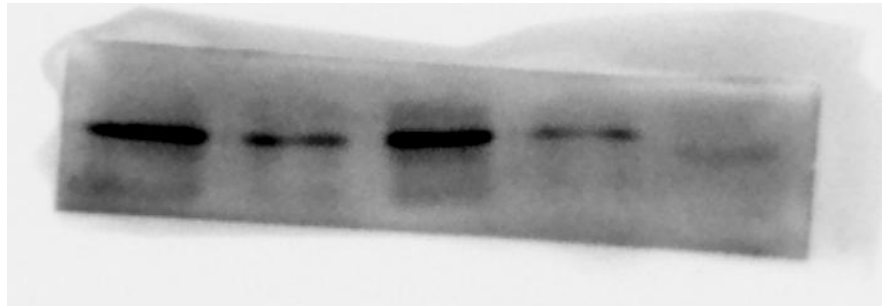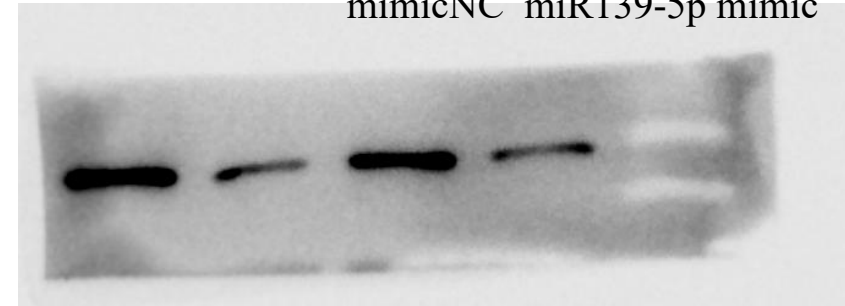

65KD

$\beta$ -actin

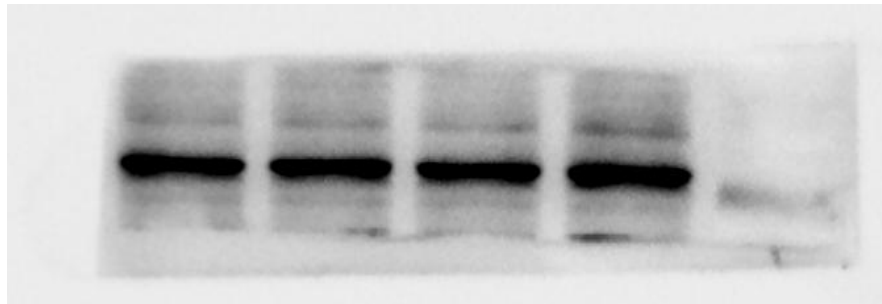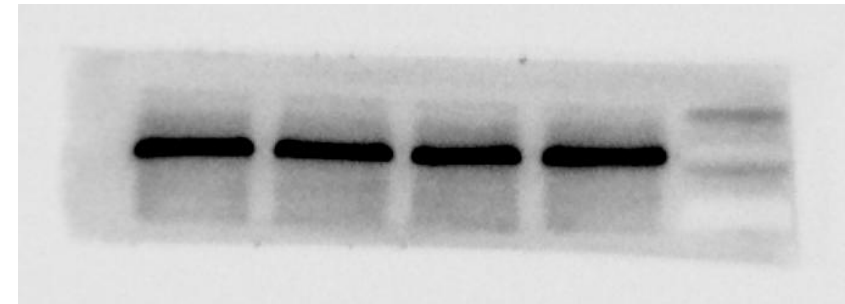

42KD



## GALNT2 (wt) -psiCHECK-2

agatctgcgcagcaccatggcctgaaataacctctgaaagaggaacttggttaggtacctctgaggcggaaagaaccagctgtggaatgtgt  
gtcagttagggtgtgaaagtccccaggctccccagcaggcagaagatgcaaagcatgcatctcaattagtcagcaaccaggtgtggaag  
tccccaggctccccagcaggcagaagatgcaaagcatgcatctcaattagtcagcaaccatagtcggccccctactccgccatcccgc  
cctaactccgccagttccgccattctccgccatggctgactaattttttattatgagagggccaggccgctcgccctctgagctatfc  
cagaagtagtgaggagctttttggaggcctaggcttttgcaaaaagcttgattctctgacacaacagctcgaactaaactgcagaagttg  
gtcgtgaggcactgggcaggtaagtatcaaggttacaagacaggtttaaaggagaccaatagaactgggctgtcagacagagaagactct  
tgcgttctgataggcacctattggcttactgacatccactttgctttctctccacaggtgtccactcccagttcaattacagctctaaaggctaga  
gtacttaatacactactataggttagccaccatggctccaaggtgtacgaccccgagcaacgcaaacgatgatcactggccctcagttg  
tggctcgtgcaagcaaatgaacgtgctggactcctcatcaactactatgattccgagaagcacgccgagaacgccgtgattttctgcatg  
gtaacgtgctccagctacgtgtggaggcacgtcgtgcctcacatcgagccgtggctagatgcatcaccctgatctgacggaatgggta  
agtccggcaagagcgggaatggctcatatgcctcctggatcactacaagtacctaccgcttggttcgagctgctgaacctccaagaaaa  
tcatctttgtggccacgactgggggctgtctggccttactactcctacgagcacaagacaagatcaaggccatgctcatgctgagag  
tgtcgtggacgtgatcgagctgggacgagtgccctgacatcgaggaggatgcctgatcaagagcgaagaggcagaaaatgt  
gcttgagaataacttctctgagaccatgctccaagcaagatcatgaggaaactggagcctgaggagttcgtgctacctggagccatt  
caagagaaaggcaggttagacggcctaccctctctggcctcgcgagatccctctgftaaggaggcaagcccagctgctcagatt  
gtccgcaactacaacgcctaccttggccagcagatctgcctaagatgttcatcgagtcgacccctgggtctttccaacgctattgtcga  
gggagctaaaggtcccaacaccgagttcgtgaaggtgaaggcctccactcagccaggaggacgtccagatgaaatgggtaagtac  
atcaagagcttctgtgagcgtgctgaagaacgagcagtaatttaggcgatcgtcagAGTCCCTCTCTGCTCCTC  
CATTCGCAAGTGTCTTCTGGGCCAGACTCCCCTCCACCTCATGTACTTGCTATATTGAG  
GATGAAGTTTTCTATGGTGGGACACTAAATATAAAGCTATATAGAGAAAGAATGTACGG  
TCAGTTCCCTATGGTTTCTGTAGATCATCGTCATCTTGTATATTCCCCACAAAGCCGTT  
GCAGTTCCGGGAGAAGGGGCCAGAGCCCGGTGGGGCCAGTTTCTCACAGAGGGAG  
GAGGTGGCCTCGTGC ACTGTGGCCTTGGAGTTAGGAGCCACCCTGGGAGGTTGTGCC  
GGTGCCATGCTCCTCCCTGTGTCTTGTATGAAAGGGGCCACTGTGTGTCTTCTCCCCG  
GCGGGAGCCCCACATGTAGGACAGCGGCCCGAGGTGGAAGCCTGGCTGGAGGGCTG  
CCCTATAGGTCTTCTTCTCCCGCTCCCCTGCCATGCAACCAGATGTGTTGTGAGTGGG  
CAGCGTGCCCCA gcgccgctggccgcaataaataatctttatttaccatctgtgtgtgtgtgtgtgagatctaatga  
gtcttcggaactcgcggggccgcttaagcgggtggtaggggttctgacgcggggggagggggaaggaacgaacactctcattcggag  
ggcgtcgggggtgtgtgtgtgtggccagggcacgagaagagcggcgcgatccttaagcaccccccgccctcgtgaggcgggg  
gtttgctggcgggtgtaactggcggccgctgactcggcgggtcgcgcgccagagtgacctttcgtgtctgcagaccccc  
ggggggcggccggcggcgagggcgtcgtgggtcctaggctccatggggaccgtatagtgagacaggtctggagatccgcac  
gactcgggtgatattaccggagaccttctcgggacgagccgggtcacggcgtgacgcggagcgtccgttggcgacaacaccagga  
cggggcacaggtacactatctgtcaccggagcgcgagggactgcaggagctcagggagtggcgcagctgctcatccccgtggccc  
gttctcgcgttctgtggcgtgtccccggaagaatataatttgcattgtcttttagttctatgatgacacaacccccgccagcttctcattggc  
gaattcgaacacgagatgcagtcggggcggcgggtcccaggctccacttgcataaaggtgacgcgtgtggcctcgaacaccgagcg  
acctgcagcagaccgcttaaaagcttggcattccggtactgttgtaaaaccaccatggccgatgctaagaacattaagaaggccctgctc  
cttctacctctggaggatggcaccgctggcagcagctgcacaaggccatgaagaggtatgccctggtgctggcaccattgcttacc  
gatgccacattgaggtggacatcacctatgccagctactcagatgtctgtgcctggccgagccatgaagaggtacggcctgaacac  
caaccaccgacgtgtgtgtctgagaactctcagcttctcatgccagctgtggcgcctgttcatcgagtgggcgtggcccctgct  
aacgacattfacaacgagcgcgagctgtgaacagcatggcatttctagcctaccgtggtgtctgtctaaagggcctgcagaagatc  
ctgaacgtgcagaagaagctgcctatcatcagaagatcatcatatggacttaagaccgactaccagggctccagagatgtacacattc  
gtgacatctcatctgctcctggcttaacgagtagcttctgacagggacaaaaccattgcctgatcatgaacagctc

tgggtctaccggcctgcctaaggcgtggccctgcctcatcgaccgctgtgtgcgcttctcacgcccgcaccctatfttcggaacca  
gatcatccccgacaccgctatftctgagcgtggtgccattccaccagggcttcggcatgttaccaccctgggctactgatttgcggcttctggg  
tgggtctgatgtaccgcttcgaggagagctgttctctgcgcagcctgcaagactacaaaattcagcttgcctctgctggtccaacctgttcag  
cttctcctaagagcaccctgatcgacaagctacacctgtctaacctgcacgagattgctctggcggcggccactgtctaaggaggtggg  
cgaagcctggccaagcgttctatctgccaggcatccgccagggtacggcctgaccgagacaaccagcgcattctgattaccagag  
ggcgacgacaagcctggcggcctggggcaaggtggtgccattctcagggccaaggtggtggacctggacaccggcaagacctgggagt  
gaaccagcgcggcagctgtgtgtgcgcccctatgattatgtccggctacgtgaataacctgaggccacaacgcctgatcgacaag  
gacggctggctgcactctggcgacattgcctactgggacgaggacgagcacttctcatctggaccgctgaagtctctgatcaagtaag  
ggctaccaggtggccccagccgagctggagctatctctgtgcagaccctaacttttcgacggcggagtggccggcctgcccagcagc  
atgccggcagctgctgcccggctgctgtctggaacacggcaagacctgaccgagaaggagatcgtggactatgtggccagccag  
gtgacaaccgccaagaagctgcgcggcggagtgggtgtctgtggacgaggtgccaaggcctgaccggcaagctggacggccgcaaga  
tccgcgagatcctgatcaaggctaagaaggcggcaagatgccgtgtaataattctagatcggggcggccggccttcgagcagacat  
gataagatactgatgagttggacaaccacaactagaatgcagtgaaaaaatgctttatgtgaaattgtgatgctattgctttatgtaac  
cattataagctgcaataaacaagtaacaacaacaattgcatctttatgtttcaggttcagggggaggtgtgggaggttttaagcaagtaa  
aacctctacaatgtggtaaaatcgataaggatccaggtggcacttttcgggaaatgtgcgcggaaccttattgtttatcttaatacattc  
aaatgtatccgctcatgagacaataacctgataaatgcttaataatgaaaaaggaagatgagattcaacattccctgtcgcctt  
attcccttttgcggcattttgcttctgttttgcaccagaacgctgtgaaagtaaaagatgctgaagatcagttgggtgcacgagtg  
gtacatcgaactggatctcaacagcggtaagatccttgagattttcggccgaagaactttccaatgatgagcacttttaagtctgctatg  
tggcgggtattatcccgtattgacggcggcaagcaactcggcgcatacactattctcagaatgacttgggtgagctaccagtc  
acagaaaagcatctacggatggatgacagtaagagaattatgcagtgctccataacctgagtgataaactgcggccaacttacttctga  
caacgatcggaggaccgaaggagtaaccgctttttgcacaacatgggggatcatgtaactcgccttgatcgttgggaaccggagctgaatg  
aagccatacaaacgacgagcgtgacaccagatgctgtagcaatggcaacaacttgcgcaactatfaactggcgaacttactctag  
cttcccgcaacaatfaatagactggatggagggcgaataaagtgcaggaccacttctgcgctcggccctccggctggctggtttatgctgat  
aaatctggagccggtgagcgtgggtctcgggtatcattgcagcactggggccagatggtaagccctcccgtatcgtatctacacgacg  
gggagtcaggcaactatggatgaacgaaatagacagatcgtgagataggtgcctcactgattaagcattgtaactgtcagaccaagtact  
catatatactttagattgatttaaaactcatttttaatttaaaaggatctaggtgaagatccttttgataatctcatgaccaaaatccctaacgtgag  
ttctgctcactgagcgtcagaccccgtagaaaagatcaaaagatctcttgatcctttttctgcgcgtaactgctgcttgcacaacaaaaa  
accaccgctaccagcgggtggtttgttccggatcaagactaccaactttttcgaaggtaactggcttcagcagagcgcagatacaaaat  
actgttctctagtgtagccgtagtttagccaccactcaagaactctgtagcaccgctacatacctcgtctgctaactctgttaccagtgctg  
ctgccagtgccgataagctgtcttaccgggtggactcaagacgatgtagccgataaggcgcagcggctcgggctgaaccggggggttc  
gtgcacacagccagcttggagcgaacgacctacaccgaactgagatactacagcgtgagctatgagaaagcggcacttcccgaagg  
gagaaagcggacaggtatccggtaaagcggcagggctggaacagggagagcgcacgagggagctccagggggaaacgcctggtatctt  
atagctctgctgggttccacacctctgacttgagcgtcgtttttgtgatgctcgtcagggggcgggacctatgaaaaacgccagcaacgc  
ggccttttacggctcctggccttttctgctcacttttctccacatggctcgac

## **GALNT2 (mut) -psiCHECK-2**

agatctgcgcagccatggcctgaaataacctctgaaagaggaacttgggttaggtacttctgagggcggaaagaaccagctgtggaatgtg  
gtcagttagggtgtgaaagtccccaggtccccagcagcagaagatgcaaaagatgcatctcaattagtcagcaaccaggtgtggaag  
tccccaggtccccagcagcagaagatgcaaaagatgcatctcaattagtcagcaaccatagtcggcccttaactccgccatcccccc  
cctaactccgccagttccgccattctcggcccatggctgactaattttttatgatgagggccgagggcctcggcctctgagctatc  
cagaagtagtgaggagctttttggaggcctaggttttcaaaaagcttattcttgacacaacagtctcgaacttaagctgcagaagttg  
gtcgtgaggcactggcaggttaagatcaaggttaacagacaggttaaggagaccaatagaaactgggcttctcagacagagaagactc  
tgcgttctgataggcacctattggtcttactgacatccactttgcttctccacaggtgtccactcccagttcaattacagctcttaaggctaga

gtacttaatacactactataggctagccaccatggctccaaggtgtacgacccccgagcaacgcaaacgatgatcactgggacctcagtggtggctcgtgcaagcaaatgaacgtgctggactcctcatcaactactatgattccgagaagcagccggagaacgccgtgatttttctgcatggtaacgtgacctccagctacgttgaggacgctgctgacctacatcgagcccggtggctagatgcatcatccctgatctgatcggaaatgggtagtccggcaagagcgggaatggctcatatgctcctggatcactacaagtacctaccgcttggtcagctgctgaacctccaagaaaaatcatcttggggccagctgggggctgtctggccttactactctacgagcaccagaagacaagatcaaggccatgctccatgctgagagtctgtggacgtgatcagctcctgggacgagtgccctgacatcgaggaggatcgccctgatcaagagcgaagaggcgagaaaatggtgcttgagaataactctctgctgagaccatgctccaagcaagatcatcggaactggagcctgaggagttcgtgctacctggagccattcaaggagaaggcgaggttagacggcctaccctctctggcctcgcgagatccctctgtaaggagggaagcccagctcgtccagattgtccgcaactacaacgcctaccttggccaagcagctgctcaagatgctcatcgagctccgacctgggtctttccaacgctattgtcaggggagcctaagaagtcccaaacaccgagttcgtgaaggtgaaggcctcactcagccaggagacgctccagatgaaatgggtaagtagatcaagagcttctgagcgcgtgctgaagaacgagcagtaattctaggcgtcgtcagAGTCCCTCTCTGCTCCTCCATTCGCAAGTGTCTTCCCTGGGCCAGACTCCCCTCCACCTCATGTACTTGCTATATTGAGGATGAAGTTTTCTATGGTGGGACACTAAATATAAAGCTATATAGAGAAAGAATGTACGGTCAGTTCCCTATGGTTTTTATGGATCATCGTCATCTTGTATATTCCCCACAAAGCCGTTCCAGCTTCCGGGAGAAGGGGCCAGAGCCCGGTGGGGCCAGTTTCTCACAGAGGGAGGAGGTGGCCTCGGCCTTGGAGTTAGGAGCCACCCTGGGAGGTTGTGCCGGTGCCATGCTCCTCCCTGTGTCTTGTATGAAAGGGGCCACTGTGTGTCTTCTCCCCGGCGGGAGCCCACATGTATACGCCGACAGGACAGCGGCCCCGAGGTGGAAGCCTGGCTGGAGGGCTGCCCTATAGGTCTTCTTCCCCGCTCCCCTGCCATGCAACCAGATGTGTTGTGAGTGGGCAGCGTGCCCCAagcgccctggccgcaataaaatcttttttcttaccatctgtgtgtgtttttgtgtgaggatctaaatgagcttccgacctcgcggggcgcttaagcgggtggttaggggttctgacgcggggggagggggaaggaacgaaacactctcattcggaggcggctcgggggttcttggggccacgggcacgcagaagagcgcgcgatccttcttaagcaccctccctcctggaggcgggggttggctcgggggtgtaactggcgccgctgactggcgggctcgcgcgccccagagtgtagctttctggctgctcgcagacccccggcgccgcccgcggcggcgagggctcgtgggtcctaggtccatggggaccgtatacgtggacaggtctggagcatccgcacgactcgggtgatattaccggagacctctcgggacgagccgggtcacgcggctgacgcggagcgtccgttggcgacaacaccaggacgggacaggtactatctgtcaccggagcgcgagggactgcaggagctcaggagtgggcgagctgctcatccccgtggcccgtgctcgcgttctggtggctgcccgaagaatataattgcatgtctttagtctatgatgacacaaacccccccagcgttctgctcattggcgatcgaacacgcagatgcagtcggggcgccgctccaggtccactcgcataaaggtgacgcgtgtggcctcgaacaccgagcaccctgcagcagaccgctfaaaagcttggcattccggtactgttggtaaagccaccatggccgatgctaagaacattaagaaggccctgctccctctaccctctggaggatggcaccgctggcgagcagctgcacaagccatgaagaggtatgcctggtgctggcaccattgcctcaccgatgccacattgaggtggacatcacctatccgagtacttcgagatgctgtgctgcccgtggcgaggccatgaagaggtacggcctgaacaccaaaccaccgcatcgtgtgtctgagaactctcagttctcatgccagtgctggcgccctgttcatcgagtgccgtggcccctgctaagacattacaacgagcgcgagctgctgaacagatggcatttctcagcctaccgtgtgtctgcttaagaaggccctgcagaagatcctgaacgtgcagaagaagctgcctatcatccagaagatcatcatggacttaagaccactaccagggtccagagcatgtacacattcgtgacatctcctcctcctgctcaacgagtagcactcgtgcccagctttcagaggacaaaaccattgcctgatcatgaacagctctgggtctaccggcctgctaaggcgctggccctgctcaccgacctgctgctgctcaccgcccgcacctattttcggaaccagatcctcccagaccgctattctgagcgtggtccattccaccaggttcggcatgtcaccacctgggctacctgattgcggcttccgggtggtgctgatgaccgcttcgaggaggagctgttctcgcagcctgcaagactacaaaattcagctcctcgtggtgccaacctgttcagcttctgctaagagcaccctgatcgacaagtagcactgtctaacctgcacgagattgctctggcgcccccactgtctaaggaggtggcggaagcgtggccaagcgttcatctgccaggatccgccagggtacggcctgaccgagacaaccagcgcattctgattacccagaggcgacgacaagcctggcgccgtgggcaaggtggtgcttctcagggccaaggtggtggacctggacaccggaacacctgggagtgaaacagcggcgagctgtgtgctcgcggccctatgattatgctccgctactgtgaataacctgagggcacaacgcctgatcgacaaggagctgtgctgactctggcgacattgcctactgggacgaggacgagcacttctcatctgtggaccgctgaagtctctgatcaagtagggctaccagggtggccccagcgagctggagctctatcctgctgcagcacccctaactttcagcggcgctcccagcagcatgc

cggcgagctgcctgccgccgctgctgctggaacacggcaagaccatgaccgagaaggagatcgtggactatgtggccagccaggtga  
caaccgccaagaagctgcgcggcggagtggtgctgctggacgaggtgcccaggcctgaccggcaagctggacgcccgaagatccg  
cgagatcctgatcaaggctaagaaaggcggcaagatccgctgtaataattctagatcggggcggccggccttcgagcagacatgata  
agatacattgatgagttggacaaccacaactagaatgcagtgaaaaaatgctttattgtgaaattgtgatgctattgctttattgtaaccatt  
ataagctgcaataacaagttaacaacaacaattgcattcatttatgtttcaggttcagggggaggtgtgggaggtttttaaagcaagtaaac  
ctctcaaatgtggtaaaatcgataaggatccaggtggcactttcggggaatgtgcgcggaaccctattgttttttaataacattcaaa  
tatgtatccgctcatgagacaataaccctgataaatgcttcaataatgaaaaaggaagatgatgattcaacattccgtgctgccttattc  
cctttttgcggcattttgccttctgttttctcaccagaaacgctggtgaaagtaaaagatgctgaagatcagttgggtgcacgagtggtta  
catcgaactggatcacaacagcggtaagatccttgagagttttgccccgaagaacgtttccaatgatgagcacttttaaaagtctgctatgtg  
cgcggtattatccctgattgacgcggcgaagagcaactcggctgccgatacactattctcagaatgactgggtgagctaccagtcaca  
gaaaagcatcttacggatggcatgacagtaagaaatfatgcagtgctgcataaacatgatgataacactcggccaacttactctgaca  
cgatcggaggaccgaaggagctaaccgctttttgcacaacatgggggatcatgtaactgccttgatcgttgggaaccggagctgaatgaa  
gccatacaaacgacgagcgtgacaccacgatgcctgtagcaatggcaacaacgctgcgcaactattaactggcgaactacttacttagct  
tcccgcaacaattaatagactggatggaggcggataaagtgcaggaccacttctgcctcggccttccggctggtggtttattgctgata  
aatctggagccggtgagcgtgggtctcgcggtatcattgcagcactggggccagatgtaagccctccgctatctagttatctacacgagg  
ggagtcaggcaactatggatgaacgaaatagacagatcgtgagataggtgcctcactgattaagcattgtaactgtagaccaagttactc  
atatacttttagattgattaaaactcatttttaattaaaaggatctaggtgaagatccttttgataatctatgacaaaatccctaactgagtt  
ttcgtccactgagcgtcagaccccgtagaaaagatcaaggatcttcttgatcctttttctgcgcgtaactgctgcttgaacaaaaaaa  
ccaccgtaccagcgggtggtttgttgcggatcaagagctaccaactctttccgaaggtaactggcttcagcagagcgcagataccaata  
ctgttcttagttagccgtagttagccaccactcaagaactctgtagaccgcctacatacctcgtctgtaactctgttaccagtggtgctg  
tgccagtggcgataagctgcttaccgggtggactcaagacgatagttaccggataaggcgcagcggctcgggctgaacggggggtcgt  
gcacacagcccagctggagcgaacgacctacaccgaactgagatacctacagcgtgagctatgagaaagcgcacgcttccgaaggga  
gaaaggcggacaggtatccggtgaagcggcagggtcggaacaggagagcgcacgaggagcttccaggggaaacgcctggtatctttat  
agtctgctgggttccacactctgactgagcgtcgtttttgtgatgctcgtcagggggcggagcctatggaaaaacgccagcaacgcg  
gccttttacggttctggccttttgccttttgcctcaccatggctcgac
